# Supplementary material for: Revisiting Classical Biological Control Through the New Associations Between the Invasive Pest <em>Spodoptera frugiperda </em>J.E. Smith (Lepidoptera: Noctuidae) and Local Parasitoids
Source: Preprints.org preprint supplement (doi:10.20944/preprints202310.1928.v1), 2023-10-31
Supplement: Supplementary file 1 [file supplementary]

## Sheet: Sheet1
Kabupaten	Nama Kecamatan	Nama Desa	Jenis parasitoid	Jumlah individu	Spesies parasitoid
Bantul	Banguntapan	Tamanan	Telur	23	Telenomus remus
Bantul	Banguntapan	Wirokerten	Telur	348	Telenomus remus
Bantul	Banguntapan	Wirokerten	Telur	14	Trichogramma sp.
Bantul	Banguntapan	Jambidan	Telur	67	Telenomus remus
Bantul	Piyungan	Sitimulyo	Telur	93	Telenomus remus
Bantul	Piyungan	Srimulyo	Telur	7	Telenomus remus
Bantul	Jetis	Sumberagung	Telur	39	Telenomus remus
Bantul	Jetis	Canden	Telur	538	Telenomus remus
Bantul	Jetis	Trimulyo	Telur	51	Telenomus remus
Bantul	Jetis	Trimulyo	Pupa	1	Charops sp.
Bantul	Jetis	Trimulyo	Pupa	5	Brachymeria femorata
Bantul	Pleret	Kedaton	Telur	33	Telenomus remus
Bantul	Pleret	Pleret	Telur	30	Telenomus remus
Bantul	Pleret	Wonokromo	Telur	114	Telenomus remus
Bantul	Pleret	Wonokromo	Telur	21	Trichogramma sp.
Bantul	Pleret	Wonokromo	Pupa	3	Brachymeria lasus
Bantul	Sewon	Bangunharjo	Telur	424	Telenomus remus
Bantul	Sewon	Timbulharjo	Telur	460	Telenomus remus
Bantul	Sewon	Timbulharjo	Telur	3	Trichogramma sp.
Bantul	Kasihan	Tamantirto	Telur	173	Telenomus remus
Bantul	Kasihan	Tirtonirmolo	Telur	127	Telenomus remus
Bantul	Sedayu	Argorejo	Telur	33	Telenomus remus
Bantul	Sedayu	Argorejo	Larva	3	Stenobracon sp.
Bantul	Sedayu	Argosari	Telur	153	Telenomus remus
Bantul	Sedayu	Argodadi	Telur	474	Telenomus remus
Bantul	Pajangan	Triwidadi	Telur	17	Telenomus remus
Bantul	Pajangan	Sendangsari	Telur	132	Telenomus remus
Bantul	Pajangan		Larva	1	Archytas marmoratus
Bantul	Kasihan		Larva	1	Megaselia scalaris
Bantul	Pajangan	Sendangsari	Telur	7	Trichogramma sp.
Bantul	Pandak	Wijirejo	Telur	676	Telenomus remus
Bantul	Pandak	Gilangharjo	Telur	591	Telenomus remus
Bantul	Pandak	Triharjo	Telur	16	Telenomus remus
Bantul	Srandakan	Trimurti	Telur	123	Telenomus remus
Bantul	Srandakan	Poncosari	Telur	281	Telenomus remus
Bantul	Srandakan	Poncosari	Telur	84	Trichogramma sp.
Bantul	Bantul	Palbapang	Telur	829	Telenomus remus
Bantul	Bantul	Ringinharjo	Telur	269	Telenomus remus
Bantul	Bantul	Trirenggo	Telur	52	Telenomus remus
Bantul	Kretek	Donotirto	Telur	13	Telenomus remus
Bantul	Kretek	Tirtosari	Telur	1095	Telenomus remus
Bantul	Kretek	Tirtosari	Telur	5	Trichogramma sp.
Bantul	Sanden	Gadingharjo
Bantul	Sanden	Gadingsari	Telur	206	Telenomus remus
Bantul	Sanden	Murtigading	Telur	527	Telenomus remus
Bantul	Bambanglipuro	Sidomulyo	Telur	13	Telenomus remus
Bantul	Bambanglipuro	Sumbermulyo	Telur	69	Telenomus remus
Bantul	Bambanglipuro	Mulyodadi	Telur	41	Telenomus remus
Bantul	Imogiri	Selopamioro
Bantul	Imogiri	Kebonagung	Telur	18	Telenomus remus
Bantul	Imogiri	Sriharjo	Telur	98	Telenomus remus
Bantul	Pundong	Seloharjo	Telur	47	Telenomus remus
Bantul	Pundong	Srihardono	Telur	3	Telenomus remus
Bantul	Pundong	Srihardono	Telur	64	Trichogramma sp.
Bantul	Pundong	Panjangrejo
Bantul	Dlingo	Terong	Telur	161	Telenomus remus
Bantul	Dlingo	Temuwuh	Telur	72	Telenomus remus
Sleman	Berbah	Tegaltirto	Larva	19	Microplitis sp.
Sleman	Berbah	Kalitirto	Telur	3	Telenomus remus
Sleman	Ngemplak	Bimomartani
Sleman	Ngemplak	Wedomartani	Telur	21	Hymenoptera sp.2
Sleman	Pakem	Hargobinangun	Pupa	1	Charops sp.
Sleman	Pakem	Pakembinangun
Sleman	Cangkringan	Wukirsari
Sleman	Cangkringan	Cangkringan	Telur	15	Telenomus remus
Sleman	Cangkringan	Cangkringan	Larva	8	Apanteles sp.
Sleman	Cangkringan	Argomulyo	Telur	35	Telenomus remus
Sleman	Kalasan	Tirtomartani
Sleman	Kalasan	Selomartani
Sleman	Kalasan	Purwomartani
Sleman	Prambanan	Madurejo
Sleman	Prambanan	Bokoharjo
Sleman	Ngaglik	Donoharjo
Sleman	Ngaglik	Sukoharjo
Sleman	Sleman	Trimulyo	Telur	106	Telenomus remus
Sleman	Sleman	Pandowoharjo	Telur	386	Telenomus remus
Sleman	Sleman	Condongcatur	Telur	15	Telenomus remus
Sleman	Sleman	Maguwoharjo
Sleman	Turi	Bangunkerto	Telur	10	Telenomus remus
Sleman	Turi	Donokerto
Sleman	Mlati	Sendangadi	Telur	822	Telenomus remus
Sleman	Mlati	Sendangadi	Larva	66	Apanteles sp.
Sleman	Mlati	Margoadi	Telur	255	Telenomus remus
Sleman	Tempel	Tambakrejo
Sleman	Tempel	Pondokrejo	Telur	227	Telenomus remus
Sleman	Moyudan	Sumber Rahayu	Telur	4	Telenomus remus
Sleman	Moyudan	Sumbersari	Telur	87	Telenomus remus
Sleman	Moyudan	Sumbersari	Larva	1	Apanteles sp.
Sleman	Moyudan	Sumbersari	Larva	1	Coccygidium sp.
Sleman	Moyudan	Sumbersari	Larva	1	Campoletis sp.
Sleman	Moyudan	Sumbersari	Pupa	1	Charops sp.
Sleman	Minggir	Sendang Agung	Telur	9	Telenomus remus
Sleman	Godean	Sidoagung
Sleman	Godean	Sidomulyo	Telur	90	Telenomus remus
Sleman	Seyegan	Margoagung	Telur	246	Telenomus remus
Sleman	Seyegan	Margoagung	Larva	35	Apanteles sp.
Sleman	Seyegan	Margomulyo	Telur	14	Telenomus remus
Sleman	Seyegan	Balecatur
Sleman	Gamping	Trihanggo
Gunung Kidul	Playen	Plembutan	Telur	24	Telenomus remus
Gunung Kidul	Playen	Gading	Telur	154	Telenomus remus
Gunung Kidul	Patuk	Putat	Telur	1	Telenomus remus
Gunung Kidul	Patuk	Putat	Telur	2	Hymenoptera sp.1
Gunung Kidul	Patuk	Ngoro-Oro
Gunung Kidul	Paliyan	Grogol	Telur	41	Hymenoptera sp.1
Gunung Kidul	Paliyan	Sodo
Gunung Kidul	Panggang	Giriwungu
Gunung Kidul	Panggang	Girisuko
Gunung Kidul	Wonosari	Siraman	Telur	287	Telenomus remus
Gunung Kidul	Wonosari	Siraman	Larva	1	Campoletis sp.
Gunung Kidul	Wonosari	Siraman	Larva	1	Microplitis sp.
Gunung Kidul	Wonosari	Kepek	Telur	90	Telenomus remus
Gunung Kidul	Wonosari	Gari
Gunung Kidul	Semin	Beji	Larva	1	Coccygidium sp.
Gunung Kidul	Semin	Semin
Gunung Kidul	Ngawen	Kampung	Telur	69	Telenomus remus
Gunung Kidul	Ngawen	Watusigar
Gunung Kidul	Karangmojo	Gedangrejo	Telur	73	Telenomus remus
Gunung Kidul	Karangmojo	Gedangrejo	Telur	6	Hymenoptera sp.1
Gunung Kidul	Karangmojo	Bejiharjo
Gunung Kidul	Semanu	Semanu	Larva	14	Microplitis sp.
Gunung Kidul	Semanu	Semanu	Larva	26	Apanteles sp.
Gunung Kidul	Semanu	Ngeposari
Gunung Kidul	Purwosari	Giripurwo
Gunung Kidul	Purwosari	Girijati	Telur	133	Telenomus remus
Gunung Kidul	Saptosari	Kepek	Larva	1	Apanteles sp.
Gunung Kidul	Saptosari	Jetis
Gunung Kidul	Gedangsari	Ngalang
Gunung Kidul	Gedangsari	Hargomulyo
Gunung Kidul	Nglipar	Karangtengah
Gunung Kidul	Nglipar	Kedung Keris
Gunung Kidul	Tepus	Sumberwungu
Gunung Kidul	Tepus	Giripanggung
Gunung Kidul	Ponjong	Sidorejo
Gunung Kidul	Ponjong	Kuwon
Gunung Kidul	Girisubo	Ngrombo
Gunung Kidul	Girisubo	Jepitu
Gunung Kidul	Rongkop	Pringombo
Gunung Kidul	Rongkop	Petir
Kulonprogo	Sentolo	Sukoreno	Larva	6	Eupelmus sp.
Kulonprogo	Sentolo	Salamrejo
Kulonprogo	Galur	Tirtorahayu	Larva	12	Apanteles sp.
Kulonprogo	Galur	Pandowan
Kulonprogo	Pengasih	Kedungsari
Kulonprogo	Pengasih	Margosari
Kulonprogo	Wates	Wates
Kulonprogo	Wates	Triharjo
Kulonprogo	Kalibawang	Banjarharjo	Telur	246	Telenomus remus
Kulonprogo	Kalibawang	Banjaroyo
Kulonprogo	Nanggulan	Kembang	Telur	115	Telenomus remus
Kulonprogo	Nanggulan	Wijirejo
Kulonprogo	Girimulyo	Pendoworejo	Telur	25	Telenomus remus
Kulonprogo	Lendah	Bumirejo
Kulonprogo	Lendah	Jatirejo
Kulonprogo	Panjatan	Krembang
Kulonprogo	Panjatan	Cerme
Kulonprogo	Temon	Glagah
Kulonprogo	Temon	Palihan
Kulonprogo	Kokap	Hargomulyo	Telur	71	Telenomus remus
Kulonprogo	Kokap	Hargorejo
Kulonprogo	Samigaluh	Purwoharjo	Telur	19	Telenomus remus
Kulonprogo	Samigaluh	Sendangrejo
